# Supplementary material for: A Glycosaminoglycan Extract from Portunus pelagicus Inhibits BACE1, the β Secretase Implicated in Alzheimer’s Disease
Source: MDPI journal article supplement (doi:10.3390/md17050293), 2019-05-16
Supplement: s1 [file s1]

## Supplementary Materials

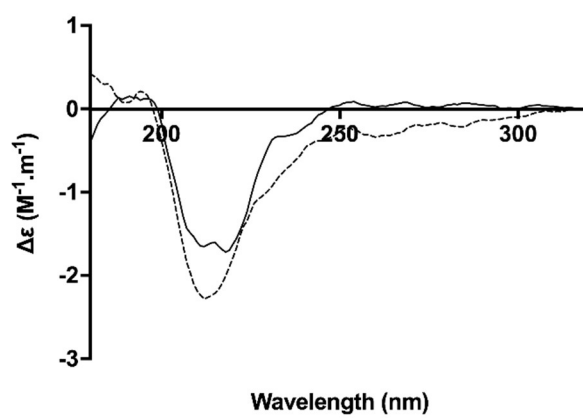

**S1:** The CD structural change of BACE1 (solid) observed in the presence of *P. pelagicus* F5 (dashed) with a ratio of 2:1 w/w, B:F5.
